# Supplementary material
Source: publisher figshare collection journal article supplement (https://acs.figshare.com/ndownloader/files/4070458)
Supplement: Supplementary file 1 [file 4070458]

## Supporting Information

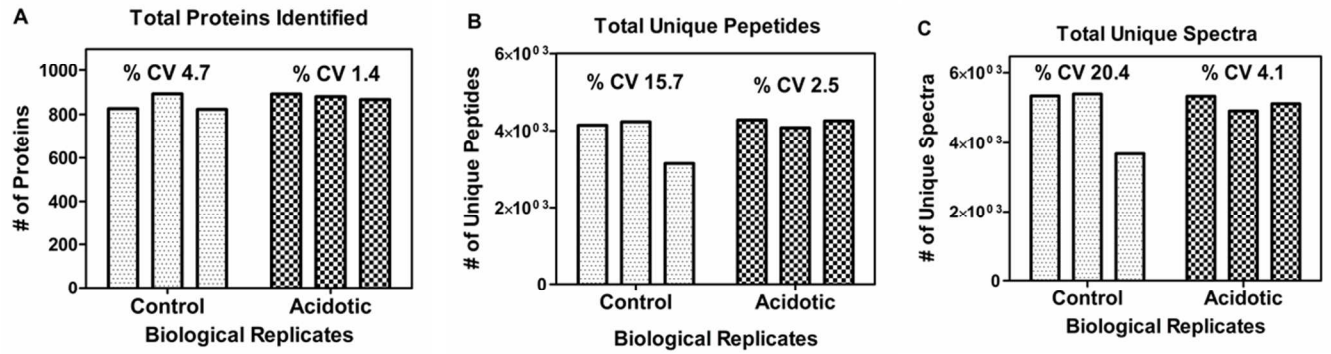

**Supplemental Figure 1.** Variance with in biological replicates represented as present of the Coefficient of Variation (% CV) for total proteins, unique peptides, and spectra identified.

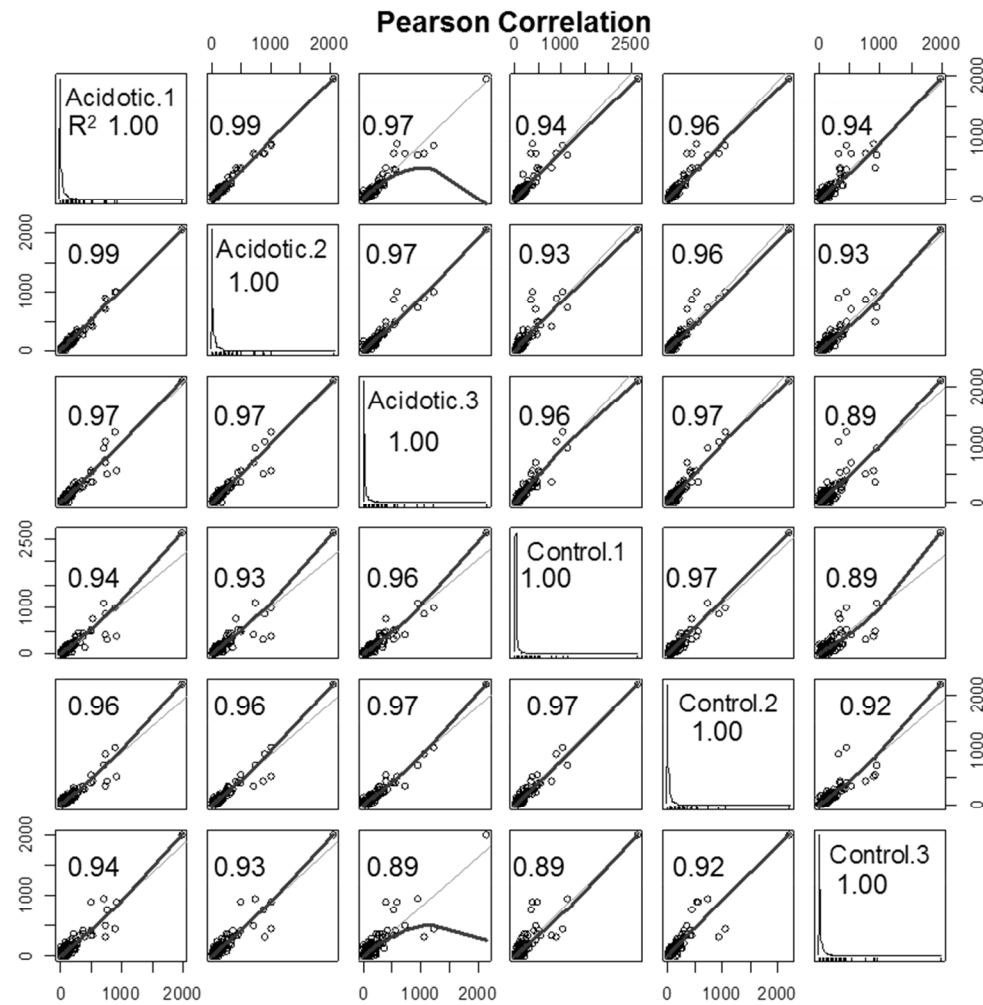

**Supplemental Figure 2.** Pearson correlation of normalized spectral counts from biological replicates control and acidic.  $R^2$  values for each correlation reported in each graph.

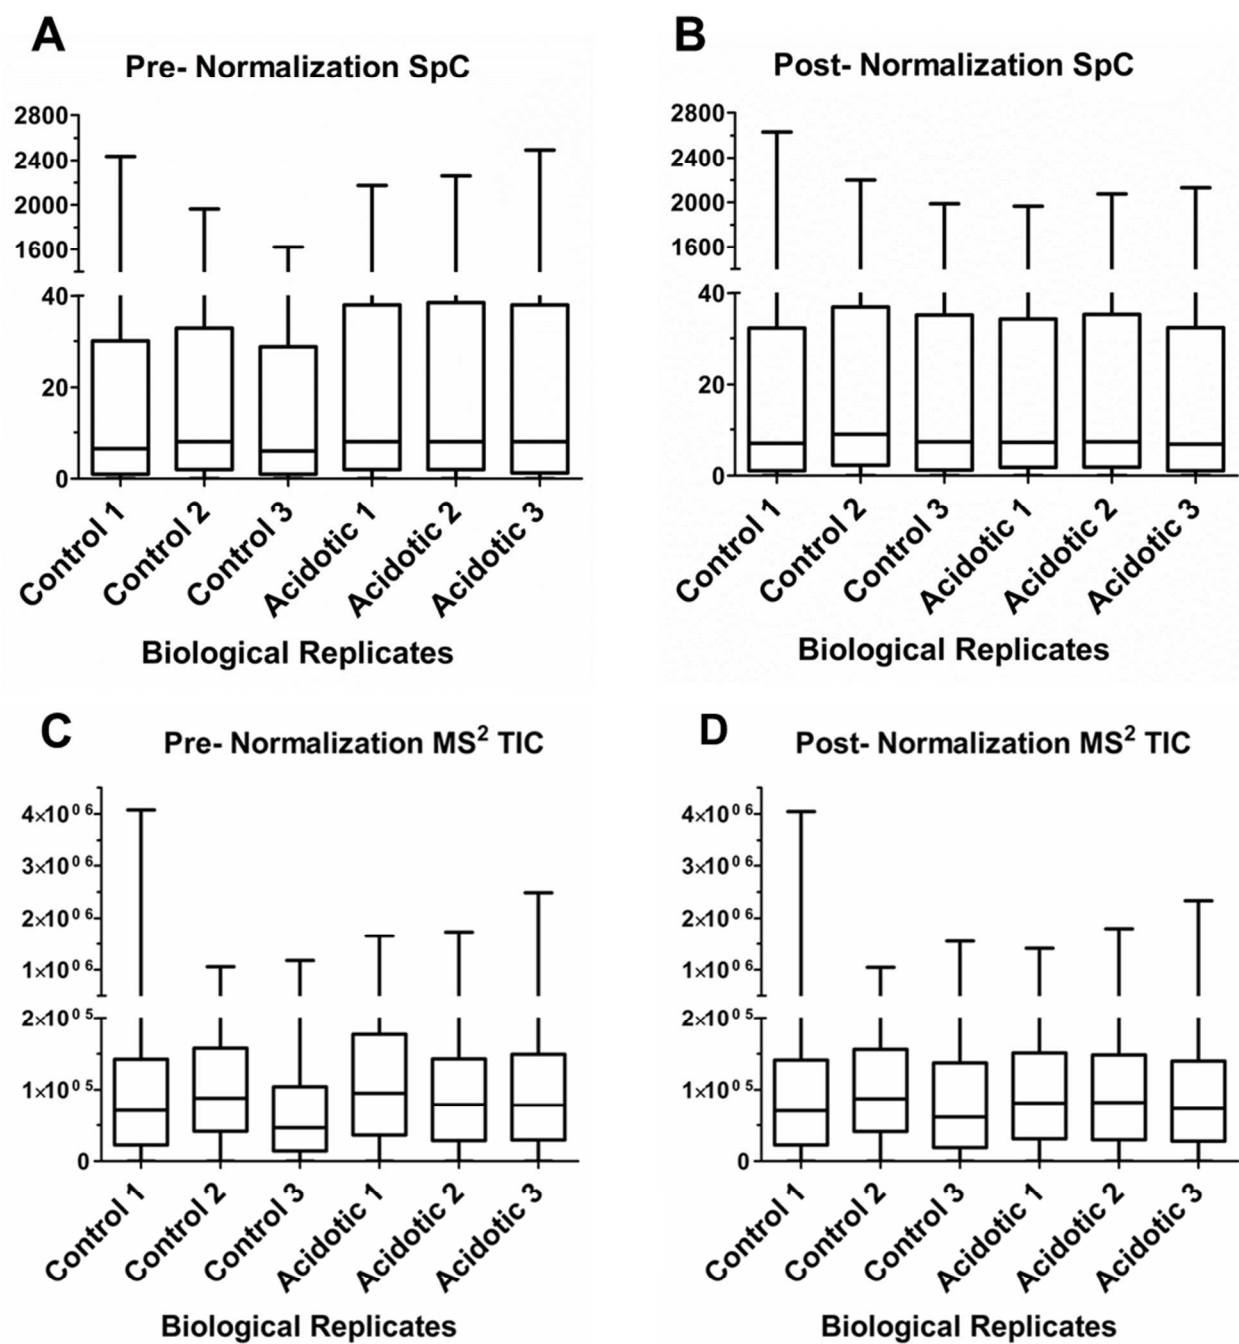

**Supplemental Figure 3.** Box plots showing dynamic range of pre and post-normalized spectral counts (SpC) or average total ion current (MS<sup>2</sup> TIC).

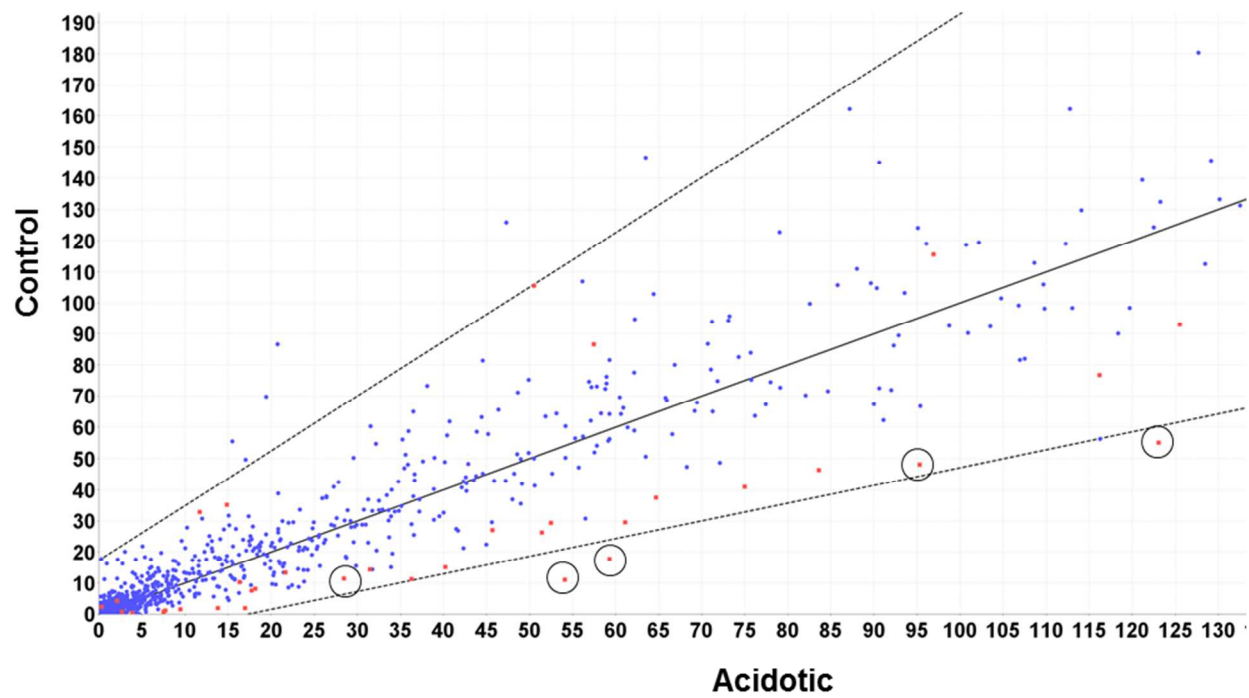

**Supplemental Figure 4.** Q-Q plot as generated in Scaffold. Dashed lines represent two standard deviations from the mean as determined by the PLGEM approach. Circled points represent a subset of proteins that had significant p-values by SpC analysis and that were also validated by western blotting.
